# Supplementary material
Source: HighWire-hosted journal article supplement (https://ajnr-sso.highwirestaging.com/highwire/filestream/89857/field_highwire_adjunct_files/0/1149.pdf)
Supplement: 1149.pdf [file 1149.pdf]

# SUPPLEMENTAL MATERIALS

| SCORE                                 | 0                | 1                                                | 2                                           |
|---------------------------------------|------------------|--------------------------------------------------|---------------------------------------------|
| <b><i>Gyration</i></b>                | Normal           | Mildly delayed ( $\leq 2GW$ )                    | Delayed ( $> 2GW$ )                         |
| <b><i>Opercularization</i></b>        | Normal           | Delayed                                          | —                                           |
| <b><i>Temporal lobe asymmetry</i></b> | Asymmetric (R>L) | Symmetrical (R=L) or Inverted (L>R)              | —                                           |
| <b><i>Hippocampi</i></b>              | Normal           | Malrotation (mild to moderate and/or unilateral) | Verticalization (bilateral), Reduced volume |
| <b><i>Lamination</i></b>              | Normal           | —                                                | Abnormal                                    |
| <b><i>Basal Ganglia</i></b>           | Normal           | Abnormal                                         | —                                           |
| <b><i>Ventricular size</i></b>        | Normal (<10mm)   | 10-14.9mm                                        | $\geq 15mm$                                 |

**Supplemental table 1** — MRI scoring categories and points to be attributed, with a maximum score of 11. R - right, L - Left, GW - Gestational weeks. Adapted from Diogo *et al* (2020) <https://doi.org/10.1002/uog.22102>

| Group      | Outcome - Area of delay |           |       |          |
|------------|-------------------------|-----------|-------|----------|
|            |                         | Cognitive | Motor | Language |
| Isolated   | Complete                | 6         | 6     | 5        |
|            | Partial                 | 4         | 6     | 4        |
| Associated | Complete                | 2         | 2     | 2        |
|            | Partial                 | 3         | 3     | 3        |

**Supplemental table 2** – Areas of neurodevelopmental delay in each group, and number of children belonging in each category.
